# Supplementary material for: Cognitive Effects of Toxoplasma and CMV Infections: A Cross-Sectional Study of 557 Young Adults Considering Modulation by Sex and Rh Factor
Source: MDPI journal article supplement (doi:10.3390/pathogens13050363), 2024-04-28
Supplement: s1 [file s1]

### Supplementary table

Table S1 Relations between sex, toxoplasmosis, CMV infection, and age and variables related to cognitive performance – the effect size (Cohen d) and significance of t-test (p)

|                                                                                      | Sex   |         | <i>Toxoplasma</i> |         | CMV   |         |
|--------------------------------------------------------------------------------------|-------|---------|-------------------|---------|-------|---------|
|                                                                                      | p     | Cohen d | p                 | Cohen d | p     | Cohen d |
| <b>I-S-T 2000 R (intelligence and knowledge: N = 533, memory: N = 305)</b>           |       |         |                   |         |       |         |
| General intelligence                                                                 | 0.001 | 0.307   | 0.053             | -0.213  | 0.744 | 0.029   |
| General knowledge                                                                    | 0.000 | 0.731   | 0.636             | -0.051  | 0.760 | -0.027  |
| Verbal intelligence                                                                  | 0.043 | 0.187   | 0.640             | -0.055  | 0.045 | 0.178   |
| Verbal knowledge                                                                     | 0.000 | 0.584   | 0.640             | 0.052   | 0.151 | 0.127   |
| Numerical intelligence                                                               | 0.000 | 0.430   | 0.091             | -0.195  | 0.792 | -0.023  |
| Numerical knowledge                                                                  | 0.000 | 0.441   | 0.087             | -0.186  | 0.206 | -0.112  |
| Figural intelligence                                                                 | 0.577 | 0.051   | 0.096             | -0.184  | 0.794 | -0.023  |
| Figural knowledge                                                                    | 0.000 | 0.692   | 0.729             | 0.037   | 0.667 | -0.038  |
| Crystallized intelligence                                                            | 0.000 | 0.725   | 0.954             | 0.006   | 0.960 | 0.004   |
| Fluid intelligence                                                                   | 0.017 | 0.220   | 0.070             | -0.208  | 0.882 | 0.013   |
| Associative memory                                                                   | 0.000 | -0.426  | 0.841             | -0.025  | 0.121 | -0.181  |
| <b>Meili memory tests (location: N = 457, free recall: N = 454, yes-no: N = 456)</b> |       |         |                   |         |       |         |
| Spatial memory                                                                       | 0.000 | -0.426  | 0.339             | -0.121  | 0.198 | -0.125  |
| Free recall memory                                                                   | 0.688 | -0.038  | 0.037             | 0.203   | 0.840 | -0.020  |
| Recognition memory                                                                   | 0.048 | -0.194  | 0.315             | -0.131  | 0.284 | -0.104  |
| <b>Simple reaction time test (N = 466)</b>                                           |       |         |                   |         |       |         |
| Reaction time                                                                        | 0.018 | -0.230  | 0.399             | 0.118   | 0.200 | 0.123   |
| <b>Prepulse tests (acoustic: N = 415, visual: 420)</b>                               |       |         |                   |         |       |         |
| Acoustic test, prepulse                                                              | 0.555 | -0.061  | 0.145             | 0.186   | 0.611 | 0.051   |
| Acoustic test, no prepulse                                                           | 0.728 | -0.034  | 0.259             | 0.136   | 0.969 | -0.004  |
| Visual test, prepulse                                                                | 0.443 | -0.078  | 0.995             | -0.001  | 0.021 | 0.230   |
| Visual test, no prepulse                                                             | 0.122 | -0.160  | 0.821             | 0.031   | 0.060 | 0.188   |
| <b>Stroop tests (test A: N = 419, test B: N = 407)</b>                               |       |         |                   |         |       |         |
| Test A, correct no-reactions                                                         | 0.391 | -0.092  | 0.381             | 0.114   | 0.490 | 0.069   |

|                                 |       |       |       |       |       |        |
|---------------------------------|-------|-------|-------|-------|-------|--------|
| Test A non-correct no-reactions | 0.026 | 0.289 | 0.603 | 0.068 | 0.451 | 0.075  |
| Test A reaction time            | 0.026 | 0.243 | 0.001 | 0.509 | 0.014 | 0.246  |
| Test B correct no-reactions     | 0.560 | 0.062 | 0.288 | 0.141 | 0.738 | 0.034  |
| Test B non-correct no-reactions | 0.367 | 0.106 | 0.232 | 0.276 | 0.237 | -0.124 |
| Test B reaction time            | 0.000 | 0.464 | 0.003 | 0.460 | 0.037 | 0.213  |
